# Supplementary material for: Structural, magnetic, and electronic properties of EuSi2 thin films on the Si(111) surface
Source: Royal Society of Chemistry journal article supplement (doi:10.1039/d1cp05913k), 2022-01-01
Supplement: d1cp05913k1.pdf [file d1cp05913k1.pdf]

## Electronic Supplementary Information

*for*

Structural, magnetic, and electronic properties of EuSi<sub>2</sub> thin films on  
Si(111) surface

Guang Yang,<sup>1,2</sup> Jun-Shuai Chai,<sup>1,3</sup> Kun Bu,<sup>1,2</sup> Li-Fang Xu,<sup>1,4</sup> and Jian-Tao  
Wang<sup>1,2,4\*</sup>

<sup>1</sup>*Institute of Physics, Chinese Academy of Sciences, Beijing 100190, China*

<sup>2</sup>*School of Physical Sciences, University of Chinese Academy of Sciences, Beijing  
100049, China*

<sup>3</sup>*Key Laboratory of Microelectronics & Integrated Technology, Institute of  
Microelectronics, Chinese Academy of Sciences, Beijing 100029, China*

<sup>4</sup>*Songshan Lake Materials Laboratory, Dongguan 523808, Guangdong, China*

---

\**E-mail address:* [wjt@aphy.iphy.ac.cn](mailto:wjt@aphy.iphy.ac.cn) (Jian-Tao Wang).

### **(1) Structural stability for the unpassivated EuSi<sub>2</sub> thin films on Si(111) surface**

We first study the structural stability of 1-3 ML unpassivated EuSi<sub>2</sub> thin films on Si(111) surface (see Fig. S1). For 2 ML EuSi<sub>2</sub> thin film, the structures in AA and AB stacking [see Fig. S1(b,c)] are simulated with interlayer FM and AFM couplings between the Eu atomic layers. As for 3 ML EuSi<sub>2</sub> thin film, AAA and ABC stacking are considered [see Fig. S1(d,e)]. The calculated relative total energy and local magnetic moment on Eu sites for 1-3 ML unpassivated EuSi<sub>2</sub> thin films on Si(111) surface are listed in Table S1. Based on the above results, we can see that AA-stacking is the most stable model for multilayer unpassivated EuSi<sub>2</sub> thin film on Si(111) surface. The calculated local magnetic moment on Eu site in each layer is 6.96-7.00  $\mu_B$ , and the ground state for the multilayer unpassivated EuSi<sub>2</sub> thin film on Si(111) surface should be in AA stacking with an AFM interlayer coupling. These structural and magnetic behaviors are in agreement with the cases with the H passivated EuSi<sub>2</sub> thin films shown in Fig. 1 in main text.

### **(2) Electronic properties for the unpassivated EuSi<sub>2</sub> thin films on Si(111) surface**

We next discuss the electronic properties of 1-3 ML unpassivated EuSi<sub>2</sub> thin films on Si(111) surface. The calculated electronic band structure for 1-3 ML unpassivated EuSi<sub>2</sub> thin films on Si(111) surface are plotted in Fig. S2(a-c). Shaded areas represent the projected Si(111) bulk bands. We find the surface states  $S_{up}$  and  $S_{dn}$  crossing the Fermi level ( $F_E$ ) show metallic feature. In order to show the distribution of 1-3 ML unpassivated EuSi<sub>2</sub>/Si(111) surface states  $S_{up}$  and  $S_{dn}$  in real space, the band-decomposed charge density distributions (BDCDDs) are calculated and plotted in Fig. S2(d-f). The surface states  $S_{up}$  and  $S_{dn}$  for 1-3 ML unpassivated EuSi<sub>2</sub> thin films are mainly contributed by the topmost Si atoms of EuSi<sub>2</sub> thin films. Their corresponding total and projected density of states (DOS) [see Fig. S2(g-i)] show that the surface states are mainly originated from the Si- $p$  orbitals. On the basis of these results, we concluded that the topmost Si atoms for EuSi<sub>2</sub> thin films are unstable and active. Thus, passivating topmost Si atoms by H atoms is essential for further investigating the electronic properties.

Table S1: The calculated relative total energy and local magnetic moment on Eu sites with FM and AFM interlayer coupling for 1ML, 2 ML in AA and AB stacking, and 3 ML in AAA and ABC stacking unpassivated EuSi<sub>2</sub> thin films on Si(111) surface.

| Model                                      | $E_{tot}$ (meV) | $M_{Eu-I}$ ( $\mu_B$ ) | $M_{Eu-II}$ ( $\mu_B$ ) | $M_{Eu-III}$ ( $\mu_B$ ) |
|--------------------------------------------|-----------------|------------------------|-------------------------|--------------------------|
| 1 ML                                       |                 | 6.99                   |                         |                          |
| 2 ML-AA( $\uparrow\downarrow$ )            | 0               | 6.98                   | -6.99                   |                          |
| 2 ML-AA( $\uparrow\uparrow$ )              | 4               | 6.97                   | 6.97                    |                          |
| 2 ML-AB( $\downarrow\uparrow$ )            | 5               | -6.98                  | 7.00                    |                          |
| 2 ML-AB( $\uparrow\uparrow$ )              | 8               | 6.96                   | 6.97                    |                          |
| 3 ML-AAA( $\uparrow\downarrow\uparrow$ )   | 0               | 6.99                   | -7.00                   | 6.99                     |
| 3 ML-AAA( $\uparrow\uparrow\uparrow$ )     | 5               | 6.97                   | 6.96                    | 6.98                     |
| 3 ML-ABC( $\downarrow\uparrow\downarrow$ ) | 170             | -6.98                  | 7.00                    | -7.00                    |
| 3 ML-ABC( $\uparrow\uparrow\uparrow$ )     | 181             | 6.99                   | 7.00                    | 7.00                     |

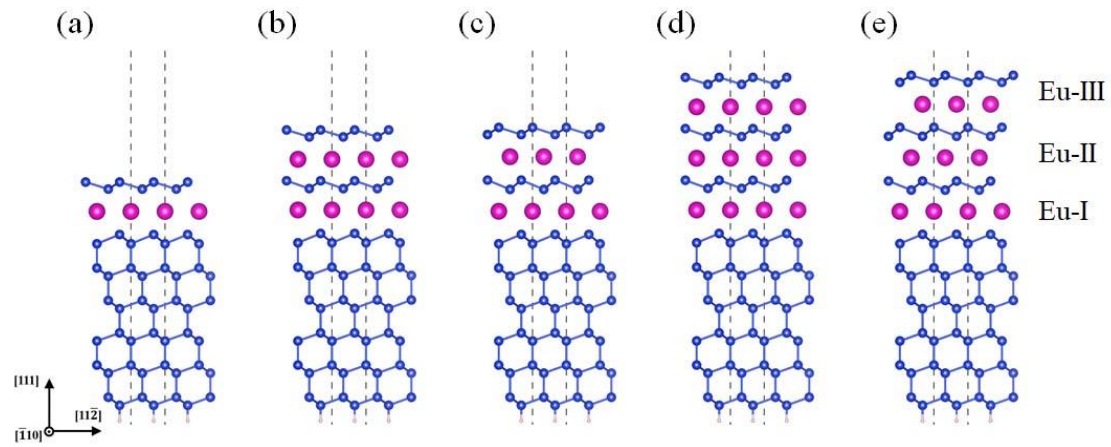

Fig. S1: The side view of unpassivated  $\text{EuSi}_2$  thin films on  $\text{Si}(111)$  surface. (a) 1 ML, (b) 2 ML in AA stacking, (c) 2 ML in AB stacking, (d) 3 ML in AAA stacking, and (e) 3 ML in ABC stacking. Dashed lines represent a  $1 \times 1$  hexagonal unit cell. The purple, blue, and white balls represent Eu, Si, and H atoms, respectively. The first, second and third Eu atomic layer are marked as Eu-I, Eu-II, and Eu-III, respectively.

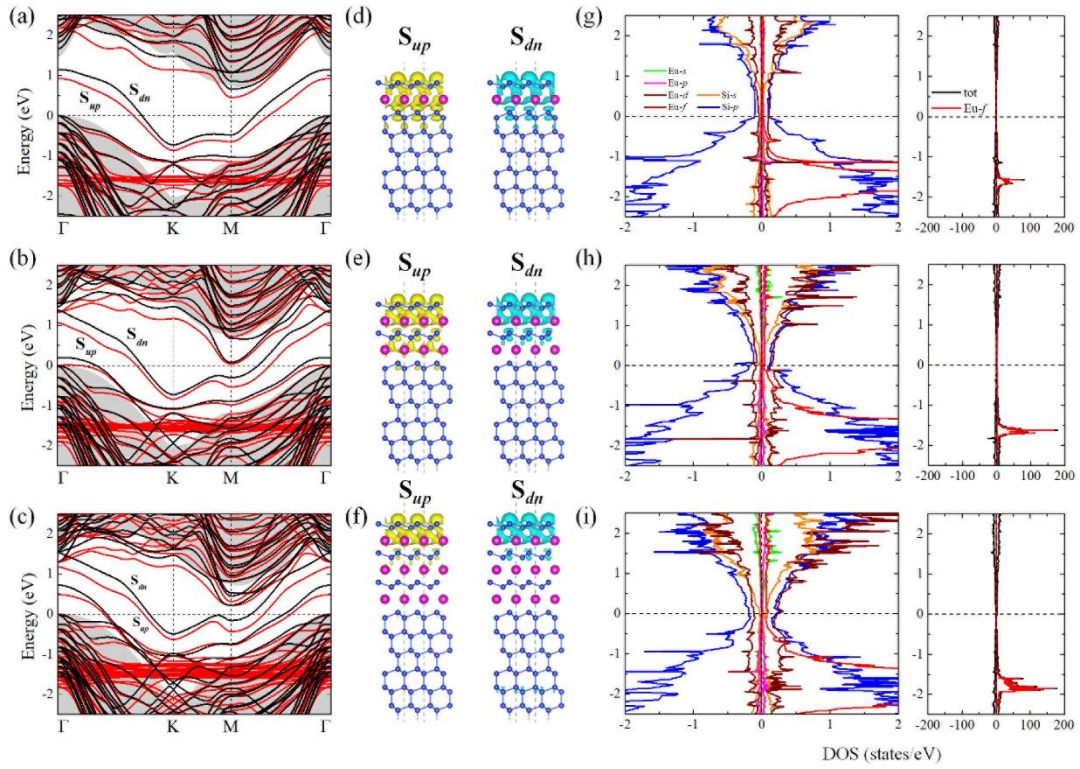

Fig. S2: The electronic band structure for (a) 1 ML, (b) 2 ML and (c) 3 ML unpassivated EuSi<sub>2</sub> thin films on Si(111) surface. Shaded areas represent the projected Si(111) bulk bands. The spin-up and spin-down states are represented by red and black lines, respectively. The BDCDDs of  $S_{up}$  and  $S_{dn}$  for (d) 1 ML, (e) 2 ML and (f) 3 ML unpassivated EuSi<sub>2</sub> thin films on Si(111) surface. The iso-surface charge density contour is 0.001 e/Bohr<sup>3</sup>. The total and projected DOS for (g) 1 ML, (h) 2 ML and (i) 3 ML unpassivated EuSi<sub>2</sub> thin films on Si(111) surface. The spin-up and spin-down states are represented by positive and negative values, respectively. The  $E_F$  is set to zero and indicated by the black dashed line.
